# Supplementary material
Source: PubMed Central journal article supplement (PMC5854187)
Supplement: NIHMS929149-supplement-Data_Supplement_with_updated_table_symbols.pdf [file NIHMS929149-supplement-Data_Supplement_with_updated_table_symbols.pdf]

## SUPPLEMENTAL MATERIAL

Supplemental Table 1: Associations with CHD for 371 metabolites in WHI-OS discovery dataset Page 2

Supplemental Table 2: Logistic regression results in the WHI-HT validation dataset for all discovered markers Page 18

Supplemental Table 3: CVs and number below the limit of detection for validated markers Page 21

Supplemental Table 4: Baseline characteristics for the PREDIMED case-cohort dataset Page 22

**Supplemental Table 1.** Association with CHD for the 371 metabolites in the WHI-OS discovery dataset.

| Metabolite.Name                              | Method  | Category    | HMDB.ID   | Matching Adjustment |         | Full Adjustment  |         |
|----------------------------------------------|---------|-------------|-----------|---------------------|---------|------------------|---------|
|                                              |         |             |           | OR (95 CI%)         | FDR p   | OR (95 CI%)      | FDR p   |
| glycodeoxycholate                            | C18-neg | Bile acids  | HMDB00631 | 1.2 (1.38, 1.05)    | 3.5E-02 | 1.1 (1.31, 0.99) | 2.5E-01 |
| glycocholate                                 | C18-neg | Bile acids  | HMDB00138 | 1.1 (1.29, 0.99)    | 1.7E-01 | 1 (1.16, 0.88)   | 8.9E-01 |
| glycochenodeoxycholate                       | C18-neg | Bile acids  | HMDB00637 | 1.1 (1.28, 0.99)    | 1.9E-01 | 1 (1.18, 0.9)    | 8.1E-01 |
| glycoursodeoxycholate                        | C18-neg | Bile acids  | HMDB00708 | 1.1 (1.28, 0.98)    | 2.2E-01 | 1 (1.2, 0.91)    | 7.5E-01 |
| deoxycholate/chenodeoxycholate               | C18-neg | Bile acids  | HMDB00626 | 1.1 (1.25, 0.96)    | 3.3E-01 | 1.1 (1.21, 0.92) | 6.8E-01 |
| taurodeoxycholate                            | C18-neg | Bile acids  | HMDB00896 | 1 (1.19, 0.92)      | 5.8E-01 | 1 (1.17, 0.89)   | 8.5E-01 |
| taurochenodeoxycholate                       | C18-neg | Bile acids  | HMDB00951 | 1 (1.19, 0.92)      | 5.9E-01 | 1 (1.15, 0.88)   | 9.2E-01 |
| taurocholate                                 | C18-neg | Bile acids  | HMDB00036 | 1 (1.19, 0.92)      | 6.0E-01 | 1 (1.13, 0.86)   | 8.9E-01 |
| hyodeoxycholate                              | C18-neg | Bile acids  | HMDB00733 | 1 (1.09, 0.84)      | 6.1E-01 | 1 (1.16, 0.88)   | 9.2E-01 |
| glycolithocholate                            | C18-neg | Bile acids  | HMDB00698 | 1 (1.18, 0.91)      | 6.6E-01 | 1.1 (1.21, 0.92) | 6.8E-01 |
| cholate                                      | C18-neg | Bile acids  | HMDB00619 | 1 (1.1, 0.85)       | 6.6E-01 | 0.9 (1.07, 0.81) | 5.7E-01 |
| taurohyodeoxycholate/<br>taoursodeoxycholate | C18-neg | Bile acids  | HMDB00874 | 1 (1.17, 0.91)      | 6.8E-01 | 1 (1.12, 0.85)   | 8.4E-01 |
| ursodeoxycholate                             | C18-neg | Bile acids  | HMDB00946 | 1 (1.17, 0.9)       | 7.0E-01 | 0.9 (1.09, 0.82) | 6.8E-01 |
| lithocholate                                 | C18-neg | Bile acids  | HMDB00761 | 1 (1.13, 0.88)      | 8.4E-01 | 1 (1.14, 0.87)   | 9.2E-01 |
| 5-HETE                                       | C18-neg | Eicosanoids | HMDB11134 | 1.4 (1.65, 1.25)    | 9.9E-06 | 1.3 (1.55, 1.17) | 5.5E-03 |
| 11-HETE                                      | C18-neg | Eicosanoids | HMDB04682 | 1.4 (1.55, 1.19)    | 3.0E-04 | 1.3 (1.48, 1.12) | 1.7E-02 |
| 15-HETE                                      | C18-neg | Eicosanoids | HMDB03876 | 1.3 (1.53, 1.17)    | 4.1E-04 | 1.2 (1.43, 1.08) | 3.7E-02 |
| 12-HETE                                      | C18-neg | Eicosanoids | HMDB06111 | 1.2 (1.39, 1.07)    | 2.2E-02 | 1.2 (1.36, 1.03) | 1.1E-01 |
| LTB4                                         | C18-neg | Eicosanoids | HMDB01085 | 1.2 (1.36, 1.05)    | 3.6E-02 | 1.1 (1.3, 0.99)  | 2.5E-01 |
| PGE2                                         | C18-neg | Eicosanoids | HMDB01220 | 1.1 (1.24, 0.95)    | 3.8E-01 | 1.1 (1.21, 0.92) | 6.8E-01 |
| docosahexaenoic acid                         | C18-neg | Fatty acids | HMDB02183 | 0.8 (0.93, 0.71)    | 1.7E-02 | 0.8 (0.97, 0.73) | 1.1E-01 |
| gamma-linolenic acid                         | C18-neg | Fatty acids | HMDB03073 | 0.9 (1.01, 0.78)    | 2.0E-01 | 0.9 (0.99, 0.75) | 1.7E-01 |
| docosapentaenoic acid                        | C18-neg | Fatty acids | HMDB01976 | 0.9 (1.02, 0.78)    | 2.2E-01 | 0.9 (1, 0.75)    | 2.0E-01 |
| eicosapentaenoic acid                        | C18-neg | Fatty acids | HMDB01999 | 0.9 (1.04, 0.8)     | 3.3E-01 | 0.9 (1.05, 0.8)  | 4.9E-01 |

| Metabolite.Name             | Method  | Category           | HMDB.ID   | Matching Adjustment |         | Full Adjustment  |         |
|-----------------------------|---------|--------------------|-----------|---------------------|---------|------------------|---------|
|                             |         |                    |           | OR (95 CI%)         | FDR p   | OR (95 CI%)      | FDR p   |
| palmitoleic acid            | C18-neg | Fatty acids        | HMDB03229 | 0.9 (1.06, 0.81)    | 4.1E-01 | 0.9 (1.08, 0.81) | 6.2E-01 |
| linoleic acid               | C18-neg | Fatty acids        | HMDB00673 | 0.9 (1.07, 0.83)    | 5.0E-01 | 0.9 (1.04, 0.79) | 4.2E-01 |
| myristic acid               | C18-neg | Fatty acids        | HMDB00806 | 0.9 (1.08, 0.83)    | 5.5E-01 | 0.9 (1.07, 0.82) | 6.1E-01 |
| 8.11.14-eicosatrienoic acid | C18-neg | Fatty acids        | HMDB02925 | 0.9 (1.08, 0.83)    | 5.5E-01 | 0.9 (1.02, 0.77) | 3.0E-01 |
| myristoleic acid            | C18-neg | Fatty acids        | HMDB02000 | 1.1 (1.2, 0.92)     | 5.7E-01 | 1.1 (1.21, 0.92) | 6.8E-01 |
| oleic acid                  | C18-neg | Fatty acids        | HMDB00207 | 1 (1.11, 0.86)      | 7.2E-01 | 0.9 (1.08, 0.82) | 6.4E-01 |
| stearic acid                | C18-neg | Fatty acids        | HMDB00827 | 1 (1.16, 0.9)       | 7.4E-01 | 1 (1.11, 0.84)   | 8.1E-01 |
| palmitic acid               | C18-neg | Fatty acids        | HMDB00220 | 1 (1.13, 0.87)      | 8.0E-01 | 0.9 (1.06, 0.8)  | 5.1E-01 |
| adrenic acid                | C18-neg | Fatty acids        | HMDB02226 | 1 (1.13, 0.87)      | 8.0E-01 | 0.9 (1.04, 0.79) | 4.1E-01 |
| arachidonic acid            | C18-neg | Fatty acids        | HMDB01043 | 1 (1.15, 0.89)      | 8.0E-01 | 0.9 (1.09, 0.83) | 6.8E-01 |
| docosatrienoic acid         | C18-neg | Fatty acids        | HMDB02823 | 1 (1.14, 0.88)      | 8.4E-01 | 1 (1.16, 0.87)   | 9.2E-01 |
| sphingosine-1-phosphate     | C18-neg | Sphingolipids      | HMDB00277 | 0.9 (1.03, 0.79)    | 2.5E-01 | 0.9 (1.03, 0.78) | 3.5E-01 |
| C16:0 Ceramide (d18:1)      | C8-pos  | Ceramides          | HMDB04949 | 1.2 (1.33, 1.03)    | 8.0E-02 | 1.1 (1.26, 0.92) | 6.1E-01 |
| C22:0 Ceramide (d18:1)      | C8-pos  | Ceramides          | HMDB04952 | 1.2 (1.32, 1.02)    | 9.0E-02 | 1 (1.17, 0.84)   | 9.2E-01 |
| C24:0 Ceramide (d18:1)      | C8-pos  | Ceramides          | HMDB04956 | 1.1 (1.28, 0.99)    | 1.8E-01 | 1 (1.22, 0.89)   | 7.8E-01 |
| C24:1 Ceramide (d18:1)      | C8-pos  | Ceramides          | HMDB04953 | 1 (1.17, 0.9)       | 7.0E-01 | 1 (1.13, 0.84)   | 8.4E-01 |
| C22:6 CE                    | C8-pos  | Cholesteryl esters | HMDB06733 | 0.8 (0.97, 0.74)    | 6.6E-02 | 1 (1.1, 0.82)    | 7.3E-01 |
| C22:4 CE                    | C8-pos  | Cholesteryl esters | HMDB06729 | 0.9 (0.98, 0.75)    | 9.8E-02 | 1 (1.22, 0.89)   | 7.6E-01 |
| C20:5 CE                    | C8-pos  | Cholesteryl esters | HMDB06731 | 0.9 (1, 0.77)       | 1.5E-01 | 0.9 (1.04, 0.77) | 4.1E-01 |
| C18:0 CE                    | C8-pos  | Cholesteryl esters | HMDB10368 | 1.1 (1.29, 1)       | 1.6E-01 | 1.1 (1.27, 0.89) | 7.1E-01 |
| C22:5 CE                    | C8-pos  | Cholesteryl esters | HMDB10375 | 0.9 (1.05, 0.81)    | 3.8E-01 | 1.1 (1.25, 0.91) | 6.8E-01 |
| C20:4 CE                    | C8-pos  | Cholesteryl esters | HMDB06726 | 0.9 (1.08, 0.83)    | 5.5E-01 | 1 (1.19, 0.85)   | 9.2E-01 |
| C14:0 CE                    | C8-pos  | Cholesteryl esters | HMDB06725 | 0.9 (1.08, 0.83)    | 5.6E-01 | 1 (1.11, 0.82)   | 7.5E-01 |
| C20:3 CE                    | C8-pos  | Cholesteryl esters | HMDB06736 | 1 (1.1, 0.85)       | 6.7E-01 | 1 (1.19, 0.88)   | 8.5E-01 |
| C16:0 CE                    | C8-pos  | Cholesteryl esters | HMDB00885 | 1 (1.1, 0.85)       | 6.8E-01 | 1.1 (1.27, 0.89) | 6.9E-01 |
| C18:1 CE                    | C8-pos  | Cholesteryl esters | HMDB00918 | 1 (1.17, 0.91)      | 6.8E-01 | 1.2 (1.48, 1.04) | 1.1E-01 |

| Metabolite.Name  | Method | Category                 | HMDB.ID   | Matching Adjustment |         | Full Adjustment  |         |
|------------------|--------|--------------------------|-----------|---------------------|---------|------------------|---------|
|                  |        |                          |           | OR (95 CI%)         | FDR p   | OR (95 CI%)      | FDR p   |
| C18:3 CE         | C8-pos | Cholesteryl esters       | HMDB10370 | 1 (1.17, 0.9)       | 7.0E-01 | 1 (1.23, 0.89)   | 7.5E-01 |
| C16:1 CE         | C8-pos | Cholesteryl esters       | HMDB00658 | 1 (1.17, 0.88)      | 7.7E-01 | 1 (1.14, 0.85)   | 8.9E-01 |
| C18:2 CE         | C8-pos | Cholesteryl esters       | HMDB00610 | 1 (1.14, 0.88)      | 8.4E-01 | 1.2 (1.36, 0.97) | 3.1E-01 |
| C36:1 DAG        | C8-pos | Diacylglycerols          | HMDB07216 | 1.2 (1.42, 1.09)    | 1.1E-02 | 0.9 (1.07, 0.76) | 4.9E-01 |
| C34:0 DAG        | C8-pos | Diacylglycerols          | HMDB07100 | 1.2 (1.39, 1.07)    | 2.4E-02 | 0.9 (1.09, 0.79) | 6.1E-01 |
| C34:1 DAG        | C8-pos | Diacylglycerols          | HMDB07102 | 1.2 (1.38, 1.06)    | 3.5E-02 | 0.9 (1.02, 0.72) | 2.7E-01 |
| C36:2 DAG        | C8-pos | Diacylglycerols          | HMDB07218 | 1.2 (1.38, 1.05)    | 3.6E-02 | 0.9 (1.04, 0.72) | 3.4E-01 |
| C32:0 DAG        | C8-pos | Diacylglycerols          | HMDB07098 | 1.2 (1.35, 1.03)    | 6.6E-02 | 0.9 (1.04, 0.76) | 3.6E-01 |
| C30:0 DAG        | C8-pos | Diacylglycerols          | HMDB07011 | 1.2 (1.32, 1.01)    | 1.1E-01 | 0.9 (1.04, 0.76) | 3.5E-01 |
| C36:3 DAG        | C8-pos | Diacylglycerols          | HMDB07219 | 1.2 (1.31, 1.01)    | 1.3E-01 | 0.8 (1, 0.71)    | 2.2E-01 |
| C34:2 DAG        | C8-pos | Diacylglycerols          | HMDB07103 | 1.2 (1.32, 1.01)    | 1.3E-01 | 0.8 (0.96, 0.67) | 1.1E-01 |
| C32:2 DAG        | C8-pos | Diacylglycerols          | HMDB07128 | 1.1 (1.31, 1)       | 1.7E-01 | 0.9 (1.01, 0.72) | 2.4E-01 |
| C32:1 DAG        | C8-pos | Diacylglycerols          | HMDB07099 | 1.1 (1.29, 0.99)    | 2.0E-01 | 0.8 (0.97, 0.69) | 1.2E-01 |
| C36:4 DAG        | C8-pos | Diacylglycerols          | HMDB07248 | 1.1 (1.25, 0.96)    | 3.3E-01 | 0.8 (0.98, 0.7)  | 1.6E-01 |
| C36:0 DAG        | C8-pos | Diacylglycerols          | HMDB07158 | 1.1 (1.24, 0.95)    | 3.8E-01 | 0.9 (1.09, 0.81) | 6.4E-01 |
| C34:3 DAG        | C8-pos | Diacylglycerols          | HMDB07132 | 1.1 (1.22, 0.93)    | 5.2E-01 | 0.7 (0.88, 0.61) | 2.1E-02 |
| C38:5 DAG        | C8-pos | Diacylglycerols          | HMDB07199 | 1 (1.19, 0.92)      | 5.9E-01 | 0.8 (0.98, 0.72) | 1.4E-01 |
| C38:4 DAG        | C8-pos | Diacylglycerols          | HMDB07170 | 1 (1.1, 0.85)       | 6.6E-01 | 0.8 (0.97, 0.72) | 1.1E-01 |
| C36:4 hydroxy-PC | C8-pos | Hydroxy-PC               | n/a       | 1.3 (1.52, 1.17)    | 4.1E-04 | 1.3 (1.44, 1.09) | 2.7E-02 |
| C34:2 hydroxy-PC | C8-pos | Hydroxy-PC               | n/a       | 1.3 (1.47, 1.12)    | 2.8E-03 | 1.2 (1.41, 1.07) | 4.6E-02 |
| C20:5 LPC        | C8-pos | Lysophosphatidylcholines | HMDB10397 | 0.9 (1, 0.77)       | 1.6E-01 | 0.9 (1.05, 0.78) | 4.2E-01 |
| C16:1 LPC        | C8-pos | Lysophosphatidylcholines | HMDB10383 | 0.9 (1.04, 0.79)    | 3.2E-01 | 0.9 (1.08, 0.81) | 6.1E-01 |
| C20:4 LPC        | C8-pos | Lysophosphatidylcholines | HMDB10395 | 0.9 (1.04, 0.8)     | 3.5E-01 | 1 (1.11, 0.83)   | 7.7E-01 |
| C18:2 LPC        | C8-pos | Lysophosphatidylcholines | HMDB10386 | 0.9 (1.07, 0.82)    | 4.9E-01 | 1.1 (1.22, 0.91) | 6.8E-01 |
| C14:0 LPC        | C8-pos | Lysophosphatidylcholi    | HMDB10379 | 0.9 (1.08, 0.82)    | 5.1E-01 | 0.9 (1.03, 0.76) | 3.4E-01 |

| Metabolite.Name        | Method | Category                         | HMDB.ID   | Matching Adjustment |         | Full Adjustment  |         |
|------------------------|--------|----------------------------------|-----------|---------------------|---------|------------------|---------|
|                        |        |                                  |           | OR (95 CI%)         | FDR p   | OR (95 CI%)      | FDR p   |
| C16:0 LPC              | C8-pos | Lysophosphatidylcholines         | HMDB10382 | 1 (1.1, 0.85)       | 6.7E-01 | 1 (1.11, 0.83)   | 7.5E-01 |
| C18:1 LPC              | C8-pos | Lysophosphatidylcholines         | HMDB02815 | 1 (1.1, 0.85)       | 6.8E-01 | 1.1 (1.22, 0.92) | 6.8E-01 |
| C20:3 LPC              | C8-pos | Lysophosphatidylcholines         | HMDB10393 | 1 (1.11, 0.85)      | 6.9E-01 | 1 (1.1, 0.83)    | 7.2E-01 |
| C18:0 LPC              | C8-pos | Lysophosphatidylcholines         | HMDB10384 | 1 (1.13, 0.87)      | 8.2E-01 | 1 (1.17, 0.86)   | 9.2E-01 |
| C22:6 LPE              | C8-pos | Lysophosphatidylethanolamines    | HMDB11526 | 0.8 (0.94, 0.72)    | 2.5E-02 | 0.9 (1.01, 0.76) | 2.5E-01 |
| C22:6 LPC              | C8-pos | Lysophosphatidylethanolamines    | HMDB10404 | 0.9 (0.97, 0.75)    | 7.7E-02 | 0.9 (1.06, 0.8)  | 5.1E-01 |
| C18:1 LPE              | C8-pos | Lysophosphatidylethanolamines    | HMDB11506 | 1.1 (1.23, 0.95)    | 4.1E-01 | 1.1 (1.25, 0.94) | 5.1E-01 |
| C16:1 LPE              | C8-pos | Lysophosphatidylethanolamines    | HMDB11504 | 1 (1.09, 0.84)      | 5.8E-01 | 0.9 (1.08, 0.82) | 6.3E-01 |
| C16:0 LPE              | C8-pos | Lysophosphatidylethanolamines    | HMDB11503 | 1 (1.11, 0.85)      | 6.8E-01 | 1 (1.14, 0.86)   | 9.2E-01 |
| C18:2 LPE              | C8-pos | Lysophosphatidylethanolamines    | HMDB11507 | 1 (1.18, 0.9)       | 6.8E-01 | 1 (1.21, 0.91)   | 7.2E-01 |
| C18:0 LPE              | C8-pos | Lysophosphatidylethanolamines    | HMDB11130 | 1 (1.14, 0.88)      | 8.4E-01 | 1 (1.14, 0.86)   | 9.1E-01 |
| C20:4 LPE              | C8-pos | Lysophosphatidylethanolamines    | HMDB11517 | 1 (1.14, 0.88)      | 8.4E-01 | 1 (1.17, 0.88)   | 8.9E-01 |
| C22:1 MAG              | C8-pos | Monoacylglycerols                | HMDB11582 | 0.9 (1.06, 0.81)    | 4.1E-01 | 0.9 (1.06, 0.81) | 5.1E-01 |
| C16:1 MAG              | C8-pos | Monoacylglycerols                | HMDB11565 | 1 (1.15, 0.89)      | 7.7E-01 | 1 (1.15, 0.88)   | 9.2E-01 |
| C18:0 MAG              | C8-pos | Monoacylglycerols                | HMDB11131 | 1 (1.15, 0.89)      | 7.7E-01 | 1 (1.15, 0.88)   | 9.2E-01 |
| C14:1 MAG              | C8-pos | Monoacylglycerols                | HMDB11562 | 1 (1.13, 0.87)      | 8.1E-01 | 1 (1.12, 0.85)   | 8.5E-01 |
| C34:3 PC plasmalogen   | C8-pos | Phosphatidylcholine plasmalogens | HMDB11211 | 0.8 (0.91, 0.7)     | 7.7E-03 | 1 (1.18, 0.85)   | 9.3E-01 |
| C38:7 PC plasmalogen   | C8-pos | Phosphatidylcholine plasmalogens | HMDB11229 | 0.8 (0.95, 0.73)    | 4.2E-02 | 0.9 (1.07, 0.8)  | 5.7E-01 |
| C34:4 PC plasmalogen   | C8-pos | Phosphatidylcholine plasmalogens | HMDB11212 | 0.8 (0.97, 0.74)    | 6.4E-02 | 1 (1.13, 0.84)   | 8.5E-01 |
| C36:5 PC plasmalogen-A | C8-pos | Phosphatidylcholine              | HMDB11221 | 0.9 (0.97, 0.75)    | 6.9E-02 | 0.9 (1.06, 0.79) | 4.9E-01 |

| Metabolite.Name        | Method | Category                         | HMDB.ID   | Matching Adjustment |         | Full Adjustment  |         |
|------------------------|--------|----------------------------------|-----------|---------------------|---------|------------------|---------|
|                        |        |                                  |           | OR (95 CI%)         | FDR p   | OR (95 CI%)      | FDR p   |
|                        |        | plasmalogens                     |           |                     |         |                  |         |
| C36:3 PC plasmalogen   | C8-pos | Phosphatidylcholine plasmalogens | HMDB11244 | 0.9 (0.98, 0.75)    | 9.0E-02 | 1.1 (1.25, 0.91) | 6.8E-01 |
| C34:2 PC plasmalogen   | C8-pos | Phosphatidylcholine plasmalogens | HMDB11210 | 0.9 (1, 0.78)       | 1.7E-01 | 1 (1.16, 0.87)   | 9.2E-01 |
| C36:5 PC plasmalogen-B | C8-pos | Phosphatidylcholine plasmalogens | HMDB11220 | 0.9 (1.01, 0.77)    | 1.7E-01 | 1 (1.13, 0.84)   | 8.5E-01 |
| C38:6 PC plasmalogen   | C8-pos | Phosphatidylcholine plasmalogens | HMDB11319 | 0.9 (1.01, 0.77)    | 1.8E-01 | 1 (1.17, 0.86)   | 9.3E-01 |
| C34:5 PC plasmalogen   | C8-pos | Phosphatidylcholine plasmalogens | HMDB11214 | 0.9 (1.03, 0.79)    | 2.6E-01 | 0.9 (1.06, 0.8)  | 4.9E-01 |
| C36:4 PC plasmalogen   | C8-pos | Phosphatidylcholine plasmalogens | HMDB11310 | 0.9 (1.06, 0.82)    | 4.6E-01 | 1 (1.13, 0.84)   | 8.6E-01 |
| C36:2 PC plasmalogen   | C8-pos | Phosphatidylcholine plasmalogens | HMDB11243 | 1 (1.08, 0.84)      | 5.7E-01 | 1.1 (1.29, 0.96) | 4.1E-01 |
| C34:1 PC plasmalogen-A | C8-pos | Phosphatidylcholine plasmalogens | HMDB11208 | 1 (1.09, 0.84)      | 6.0E-01 | 1.1 (1.32, 0.97) | 3.3E-01 |
| C40:7 PC plasmalogen   | C8-pos | Phosphatidylcholine plasmalogens | HMDB11294 | 1 (1.1, 0.84)       | 6.3E-01 | 1 (1.21, 0.9)    | 7.5E-01 |
| C36:1 PC plasmalogen   | C8-pos | Phosphatidylcholine plasmalogens | HMDB11241 | 1 (1.17, 0.91)      | 6.8E-01 | 1.2 (1.34, 1.01) | 1.8E-01 |
| C38:4 PC plasmalogen   | C8-pos | Phosphatidylcholine plasmalogens | HMDB11252 | 1 (1.16, 0.89)      | 7.4E-01 | 1.1 (1.24, 0.92) | 6.3E-01 |
| C34:1 PC plasmalogen-B | C8-pos | Phosphatidylcholine plasmalogens | HMDB11239 | 1 (1.15, 0.89)      | 8.0E-01 | 1.2 (1.37, 1.01) | 1.7E-01 |
| C40:11 PC plasmalogen  | C8-pos | Phosphatidylcholine plasmalogens | n/a       | 1 (1.14, 0.86)      | 8.0E-01 | 1 (1.15, 0.86)   | 9.2E-01 |
| C40:10 PC              | C8-pos | Phosphatidylcholines             | HMDB08511 | 0.7 (0.85, 0.65)    | 4.1E-04 | 0.8 (0.96, 0.71) | 1.0E-01 |
| C38:6 PC               | C8-pos | Phosphatidylcholines             | HMDB07991 | 0.8 (0.92, 0.71)    | 1.1E-02 | 0.9 (0.99, 0.74) | 1.7E-01 |
| C40:9 PC               | C8-pos | Phosphatidylcholines             | HMDB08731 | 0.8 (0.93, 0.72)    | 2.0E-02 | 0.9 (0.99, 0.75) | 1.7E-01 |
| C36:4 PC-A             | C8-pos | Phosphatidylcholines             | HMDB07983 | 0.8 (0.96, 0.73)    | 5.9E-02 | 0.9 (1.05, 0.78) | 4.5E-01 |
| C40:6 PC               | C8-pos | Phosphatidylcholines             | HMDB08057 | 0.9 (0.97, 0.75)    | 7.7E-02 | 0.9 (1.02, 0.76) | 2.7E-01 |
| C34:4 PC               | C8-pos | Phosphatidylcholines             | HMDB07883 | 0.9 (1, 0.76)       | 1.7E-01 | 0.9 (1.02, 0.75) | 2.8E-01 |
| C36:4 PC-B             | C8-pos | Phosphatidylcholines             | HMDB08138 | 0.9 (1.01, 0.77)    | 1.8E-01 | 0.9 (1.02, 0.75) | 2.7E-01 |

| Metabolite.Name       | Method | Category                              | HMDB.ID   | Matching Adjustment |         | Full Adjustment  |         |
|-----------------------|--------|---------------------------------------|-----------|---------------------|---------|------------------|---------|
|                       |        |                                       |           | OR (95 CI%)         | FDR p   | OR (95 CI%)      | FDR p   |
| C38:2 PC              | C8-pos | Phosphatidylcholines                  | HMDB08270 | 0.9 (1.03, 0.79)    | 2.9E-01 | 0.9 (1.09, 0.81) | 6.7E-01 |
| C34:3 PC              | C8-pos | Phosphatidylcholines                  | HMDB08006 | 0.9 (1.04, 0.78)    | 2.9E-01 | 0.9 (1.07, 0.77) | 5.1E-01 |
| C32:2 PC              | C8-pos | Phosphatidylcholines                  | HMDB07874 | 0.9 (1.04, 0.78)    | 3.3E-01 | 0.9 (1.04, 0.75) | 3.5E-01 |
| C38:4 PC              | C8-pos | Phosphatidylcholines                  | HMDB08048 | 0.9 (1.04, 0.8)     | 3.3E-01 | 0.9 (1.04, 0.77) | 4.1E-01 |
| C36:0 PC              | C8-pos | Phosphatidylcholines                  | HMDB08036 | 0.9 (1.05, 0.81)    | 3.6E-01 | 0.9 (1.1, 0.81)  | 6.8E-01 |
| C30:0 PC              | C8-pos | Phosphatidylcholines                  | HMDB07869 | 0.9 (1.05, 0.8)     | 3.8E-01 | 0.9 (1.05, 0.77) | 4.2E-01 |
| C30:1 PC              | C8-pos | Phosphatidylcholines                  | HMDB07870 | 0.9 (1.08, 0.81)    | 4.9E-01 | 0.9 (1.06, 0.78) | 5.0E-01 |
| C32:0 PC              | C8-pos | Phosphatidylcholines                  | HMDB07871 | 0.9 (1.07, 0.82)    | 4.9E-01 | 1 (1.11, 0.82)   | 7.5E-01 |
| C32:1 PC              | C8-pos | Phosphatidylcholines                  | HMDB07873 | 1 (1.11, 0.83)      | 6.5E-01 | 0.9 (1.08, 0.8)  | 6.1E-01 |
| C38:3 PC              | C8-pos | Phosphatidylcholines                  | HMDB08047 | 1 (1.18, 0.91)      | 6.8E-01 | 0.9 (1.1, 0.81)  | 6.8E-01 |
| C34:2 PC              | C8-pos | Phosphatidylcholines                  | HMDB07973 | 1 (1.12, 0.85)      | 7.1E-01 | 1 (1.15, 0.84)   | 8.9E-01 |
| C34:1 PC              | C8-pos | Phosphatidylcholines                  | HMDB07972 | 1 (1.12, 0.85)      | 7.3E-01 | 1 (1.14, 0.85)   | 8.9E-01 |
| C34:0 PC              | C8-pos | Phosphatidylcholines                  | HMDB07970 | 1 (1.16, 0.89)      | 7.6E-01 | 1 (1.16, 0.87)   | 9.2E-01 |
| C36:2 PC              | C8-pos | Phosphatidylcholines                  | HMDB08039 | 1 (1.15, 0.89)      | 8.0E-01 | 1 (1.19, 0.88)   | 8.5E-01 |
| C36:3 PC              | C8-pos | Phosphatidylcholines                  | HMDB08105 | 1 (1.14, 0.87)      | 8.1E-01 | 1 (1.17, 0.86)   | 9.3E-01 |
| C36:1 PC              | C8-pos | Phosphatidylcholines                  | HMDB08038 | 1 (1.14, 0.88)      | 8.4E-01 | 1 (1.16, 0.87)   | 9.2E-01 |
| C38:3 PE plasmalogen  | C8-pos | Phosphatidylethanolamine plasmalogens | HMDB11384 | 0.8 (0.97, 0.74)    | 6.0E-02 | 1 (1.11, 0.83)   | 7.7E-01 |
| C38:7 PE plasmalogen  | C8-pos | Phosphatidylethanolamine plasmalogens | HMDB11420 | 0.9 (0.98, 0.75)    | 9.0E-02 | 0.9 (1.03, 0.77) | 3.5E-01 |
| C44:13 PE plasmalogen | C8-pos | Phosphatidylethanolamine plasmalogens | n/a       | 0.9 (1, 0.77)       | 1.6E-01 | 1 (1.1, 0.83)    | 7.5E-01 |
| C36:3 PS plasmalogen  | C8-pos | Phosphatidylethanolamine plasmalogens | n/a       | 1.1 (1.27, 0.98)    | 2.4E-01 | 1.1 (1.26, 0.96) | 4.2E-01 |
| C40:7 PE plasmalogen  | C8-pos | Phosphatidylethanolamine plasmalogens | HMDB11394 | 0.9 (1.04, 0.79)    | 3.0E-01 | 1 (1.1, 0.82)    | 7.3E-01 |
| C38:6 PE plasmalogen  | C8-pos | Phosphatidylethanolamine plasmalogens | HMDB11387 | 0.9 (1.04, 0.79)    | 3.0E-01 | 0.9 (1.08, 0.81) | 6.0E-01 |
| C36:3 PE plasmalogen  | C8-pos | Phosphatidylethanolamine plasmalogens | HMDB11441 | 1.1 (1.24, 0.96)    | 3.5E-01 | 1.1 (1.29, 0.97) | 3.4E-01 |
| C36:1 PE plasmalogen  | C8-pos | Phosphatidylethanolamine plasmalogens | HMDB09016 | 0.9 (1.04, 0.81)    | 3.6E-01 | 1 (1.2, 0.9)     | 7.6E-01 |

| Metabolite.Name       | Method | Category                              | HMDB.ID   | Matching Adjustment |         | Full Adjustment  |         |
|-----------------------|--------|---------------------------------------|-----------|---------------------|---------|------------------|---------|
|                       |        |                                       |           | OR (95 CI%)         | FDR p   | OR (95 CI%)      | FDR p   |
|                       |        | mine plasmalogens                     |           |                     |         |                  |         |
| C36:5 PE plasmalogen  | C8-pos | Phosphatidylethanolamine plasmalogens | HMDB11410 | 0.9 (1.05, 0.81)    | 3.8E-01 | 0.9 (1.06, 0.8)  | 5.1E-01 |
| C36:2 PS plasmalogen  | C8-pos | Phosphatidylethanolamine plasmalogens | n/a       | 1 (1.21, 0.94)      | 4.8E-01 | 1 (1.18, 0.87)   | 8.9E-01 |
| C42:11 PE plasmalogen | C8-pos | Phosphatidylethanolamine plasmalogens | n/a       | 0.9 (1.07, 0.82)    | 5.0E-01 | 1 (1.11, 0.84)   | 7.9E-01 |
| C36:1 PS plasmalogen  | C8-pos | Phosphatidylethanolamine plasmalogens | n/a       | 1 (1.08, 0.84)      | 5.7E-01 | 1 (1.21, 0.89)   | 8.0E-01 |
| C38:5 PE plasmalogen  | C8-pos | Phosphatidylethanolamine plasmalogens | HMDB11386 | 1 (1.09, 0.84)      | 5.9E-01 | 1 (1.11, 0.84)   | 7.8E-01 |
| C34:2 PE plasmalogen  | C8-pos | Phosphatidylethanolamine plasmalogens | HMDB08952 | 1 (1.09, 0.84)      | 5.9E-01 | 1 (1.13, 0.86)   | 8.9E-01 |
| C36:2 PE plasmalogen  | C8-pos | Phosphatidylethanolamine plasmalogens | HMDB09082 | 1 (1.19, 0.92)      | 5.9E-01 | 1.1 (1.23, 0.93) | 6.1E-01 |
| C34:3 PE plasmalogen  | C8-pos | Phosphatidylethanolamine plasmalogens | HMDB11343 | 1 (1.09, 0.84)      | 6.0E-01 | 1 (1.11, 0.84)   | 8.0E-01 |
| C36:4 PE plasmalogen  | C8-pos | Phosphatidylethanolamine plasmalogens | HMDB11442 | 1 (1.12, 0.87)      | 7.7E-01 | 1 (1.17, 0.89)   | 8.8E-01 |
| C36:1 PE              | C8-pos | Phosphatidylethanolamine              | HMDB08993 | 1.1 (1.28, 0.98)    | 2.2E-01 | 1 (1.13, 0.84)   | 8.5E-01 |
| C36:2 PE              | C8-pos | Phosphatidylethanolamine              | HMDB08994 | 1.1 (1.28, 0.97)    | 2.5E-01 | 1 (1.11, 0.83)   | 7.5E-01 |
| C36:0 PE              | C8-pos | Phosphatidylethanolamine              | HMDB08991 | 0.9 (1.03, 0.79)    | 2.9E-01 | 0.9 (1.09, 0.8)  | 6.4E-01 |
| C38:2 PE              | C8-pos | Phosphatidylethanolamine              | HMDB08942 | 0.9 (1.03, 0.79)    | 2.9E-01 | 1 (1.17, 0.86)   | 9.3E-01 |
| C38:6 PE              | C8-pos | Phosphatidylethanolamine              | HMDB09102 | 0.9 (1.04, 0.8)     | 3.2E-01 | 0.9 (1.02, 0.77) | 3.1E-01 |
| C34:2 PE              | C8-pos | Phosphatidylethanolamine              | HMDB08928 | 1.1 (1.25, 0.95)    | 3.8E-01 | 1 (1.13, 0.85)   | 8.5E-01 |
| C36:3 PE              | C8-pos | Phosphatidylethanolamine              | HMDB09060 | 1.1 (1.23, 0.94)    | 4.8E-01 | 1 (1.16, 0.87)   | 9.2E-01 |
| C38:5 PE              | C8-pos | Phosphatidylethanolamine              | HMDB09069 | 0.9 (1.08, 0.83)    | 5.7E-01 | 0.9 (1.07, 0.8)  | 5.5E-01 |
| C40:6 PE              | C8-pos | Phosphatidylethanolamine              | HMDB09012 | 1 (1.11, 0.85)      | 6.8E-01 | 0.9 (0.99, 0.74) | 1.7E-01 |
| C34:0 PE              | C8-pos | Phosphatidylethanolamine              | HMDB08925 | 1 (1.11, 0.86)      | 7.0E-01 | 1 (1.16, 0.88)   | 8.9E-01 |



| Metabolite.Name | Method | Category                  | HMDB.ID   | Matching Adjustment |         | Full Adjustment  |         |
|-----------------|--------|---------------------------|-----------|---------------------|---------|------------------|---------|
|                 |        |                           |           | OR (95 CI%)         | FDR p   | OR (95 CI%)      | FDR p   |
|                 |        | mines                     |           |                     |         |                  |         |
| C36:4 PE        | C8-pos | Phosphatidylethanolamines | HMDB08937 | 1 (1.12, 0.86)      | 7.3E-01 | 0.9 (1.06, 0.8)  | 5.1E-01 |
| C38:4 PE        | C8-pos | Phosphatidylethanolamines | HMDB09003 | 1 (1.14, 0.87)      | 8.4E-01 | 0.9 (1.05, 0.79) | 4.2E-01 |
| sphingosine     | C8-pos | Sphingolipids             | HMDB00252 | 1 (1.13, 0.87)      | 8.0E-01 | 0.9 (1.08, 0.82) | 6.4E-01 |
| C14:0 SM        | C8-pos | Sphingomyelins            | HMDB12097 | 0.9 (1.01, 0.77)    | 1.7E-01 | 0.9 (1.06, 0.77) | 4.9E-01 |
| C22:1 SM        | C8-pos | Sphingomyelins            | HMDB12104 | 0.9 (1.01, 0.78)    | 1.9E-01 | 1 (1.16, 0.83)   | 8.7E-01 |
| C16:1 SM        | C8-pos | Sphingomyelins            | n/a       | 0.9 (1.05, 0.81)    | 3.7E-01 | 1 (1.12, 0.81)   | 7.5E-01 |
| C20:0 SM        | C8-pos | Sphingomyelins            | HMDB12102 | 0.9 (1.07, 0.82)    | 4.8E-01 | 1 (1.14, 0.82)   | 8.4E-01 |
| C18:2 SM        | C8-pos | Sphingomyelins            | HMDB12101 | 1 (1.08, 0.83)      | 5.7E-01 | 0.9 (1.09, 0.81) | 6.8E-01 |
| C18:1 SM        | C8-pos | Sphingomyelins            | HMDB12101 | 1 (1.09, 0.84)      | 6.0E-01 | 1 (1.14, 0.83)   | 8.5E-01 |
| C24:1 SM        | C8-pos | Sphingomyelins            | HMDB12107 | 1 (1.09, 0.84)      | 6.2E-01 | 1.1 (1.3, 0.95)  | 4.3E-01 |
| C18:0 SM        | C8-pos | Sphingomyelins            | HMDB01348 | 1 (1.16, 0.89)      | 7.5E-01 | 1 (1.21, 0.88)   | 8.4E-01 |
| C16:0 SM        | C8-pos | Sphingomyelins            | HMDB10169 | 1 (1.13, 0.87)      | 8.0E-01 | 1.1 (1.35, 0.96) | 3.8E-01 |
| C22:0 SM        | C8-pos | Sphingomyelins            | HMDB12103 | 1 (1.14, 0.88)      | 8.4E-01 | 1 (1.2, 0.86)    | 8.9E-01 |
| C24:0 SM        | C8-pos | Sphingomyelins            | HMDB11697 | 1 (1.14, 0.88)      | 8.4E-01 | 1.1 (1.26, 0.91) | 6.4E-01 |
| C54:1 TAG       | C8-pos | Triacylglycerols          | HMDB05395 | 1.3 (1.49, 1.14)    | 1.7E-03 | 1 (1.17, 0.85)   | 9.3E-01 |
| C54:2 TAG       | C8-pos | Triacylglycerols          | HMDB05403 | 1.3 (1.48, 1.13)    | 2.3E-03 | 1 (1.14, 0.8)    | 7.7E-01 |
| C56:10 TAG      | C8-pos | Triacylglycerols          | HMDB10513 | 0.8 (0.89, 0.68)    | 3.6E-03 | 0.8 (0.88, 0.66) | 1.1E-02 |
| C56:2 TAG       | C8-pos | Triacylglycerols          | HMDB05404 | 1.3 (1.44, 1.1)     | 8.2E-03 | 1 (1.17, 0.85)   | 9.3E-01 |
| C52:1 TAG       | C8-pos | Triacylglycerols          | HMDB05367 | 1.2 (1.43, 1.09)    | 9.9E-03 | 0.9 (1.08, 0.77) | 5.4E-01 |
| C52:0 TAG       | C8-pos | Triacylglycerols          | HMDB05365 | 1.2 (1.42, 1.09)    | 1.0E-02 | 1 (1.13, 0.83)   | 8.2E-01 |
| C54:3 TAG       | C8-pos | Triacylglycerols          | HMDB05405 | 1.2 (1.41, 1.08)    | 1.8E-02 | 0.9 (1.11, 0.79) | 6.8E-01 |
| C56:3 TAG       | C8-pos | Triacylglycerols          | HMDB05410 | 1.2 (1.41, 1.07)    | 2.0E-02 | 1 (1.16, 0.84)   | 8.9E-01 |
| C58:11 TAG      | C8-pos | Triacylglycerols          | HMDB10531 | 0.8 (0.93, 0.72)    | 2.0E-02 | 0.8 (0.91, 0.69) | 2.6E-02 |
| C52:2 TAG       | C8-pos | Triacylglycerols          | HMDB05369 | 1.2 (1.4, 1.07)     | 2.4E-02 | 0.9 (1.03, 0.72) | 3.2E-01 |

| Metabolite.Name | Method | Category         | HMDB.ID   | Matching Adjustment |         | Full Adjustment  |         |
|-----------------|--------|------------------|-----------|---------------------|---------|------------------|---------|
|                 |        |                  |           | OR (95 CI%)         | FDR p   | OR (95 CI%)      | FDR p   |
| C50:0 TAG       | C8-pos | Triacylglycerols | HMDB05357 | 1.2 (1.38, 1.06)    | 3.0E-02 | 0.9 (1.09, 0.79) | 6.1E-01 |
| C50:1 TAG       | C8-pos | Triacylglycerols | HMDB05360 | 1.2 (1.38, 1.05)    | 3.6E-02 | 0.9 (1.05, 0.76) | 4.1E-01 |
| C48:0 TAG       | C8-pos | Triacylglycerols | HMDB05356 | 1.2 (1.34, 1.02)    | 8.9E-02 | 0.9 (1.07, 0.79) | 5.2E-01 |
| C52:3 TAG       | C8-pos | Triacylglycerols | HMDB05384 | 1.2 (1.33, 1.02)    | 9.0E-02 | 0.8 (0.97, 0.67) | 1.3E-01 |
| C56:4 TAG       | C8-pos | Triacylglycerols | HMDB05398 | 1.2 (1.33, 1.02)    | 9.6E-02 | 0.9 (1.07, 0.77) | 5.2E-01 |
| C58:9 TAG       | C8-pos | Triacylglycerols | HMDB05463 | 0.9 (0.99, 0.76)    | 1.1E-01 | 0.8 (0.94, 0.71) | 4.8E-02 |
| C50:2 TAG       | C8-pos | Triacylglycerols | HMDB05377 | 1.2 (1.33, 1.01)    | 1.2E-01 | 0.8 (0.99, 0.71) | 1.8E-01 |
| C54:4 TAG       | C8-pos | Triacylglycerols | HMDB05370 | 1.2 (1.31, 1.01)    | 1.2E-01 | 0.9 (1.08, 0.78) | 5.9E-01 |
| C58:10 TAG      | C8-pos | Triacylglycerols | HMDB05476 | 0.9 (0.99, 0.77)    | 1.4E-01 | 0.8 (0.92, 0.69) | 3.6E-02 |
| C48:1 TAG       | C8-pos | Triacylglycerols | HMDB05359 | 1.1 (1.31, 1)       | 1.7E-01 | 0.9 (1.02, 0.74) | 2.7E-01 |
| C46:0 TAG       | C8-pos | Triacylglycerols | HMDB10411 | 1.1 (1.29, 0.99)    | 1.9E-01 | 0.9 (1.04, 0.77) | 4.0E-01 |
| C56:9 TAG       | C8-pos | Triacylglycerols | HMDB05448 | 0.9 (1.01, 0.78)    | 1.9E-01 | 0.8 (0.89, 0.66) | 1.7E-02 |
| C60:12 TAG      | C8-pos | Triacylglycerols | HMDB05478 | 0.9 (1.02, 0.78)    | 2.0E-01 | 0.9 (1.03, 0.78) | 3.5E-01 |
| C56:1 TAG       | C8-pos | Triacylglycerols | HMDB05396 | 1.1 (1.27, 0.98)    | 2.3E-01 | 1 (1.18, 0.89)   | 8.4E-01 |
| C52:4 TAG       | C8-pos | Triacylglycerols | HMDB05363 | 1.1 (1.27, 0.97)    | 2.5E-01 | 0.8 (0.96, 0.68) | 1.1E-01 |
| C54:9 TAG       | C8-pos | Triacylglycerols | HMDB10498 | 0.9 (1.02, 0.79)    | 2.5E-01 | 0.9 (1.03, 0.79) | 3.8E-01 |
| C58:8 TAG       | C8-pos | Triacylglycerols | HMDB05413 | 0.9 (1.03, 0.79)    | 2.5E-01 | 0.8 (0.93, 0.69) | 3.7E-02 |
| C54:5 TAG       | C8-pos | Triacylglycerols | HMDB05385 | 1.1 (1.26, 0.97)    | 2.9E-01 | 0.9 (1.02, 0.74) | 2.7E-01 |
| C46:1 TAG       | C8-pos | Triacylglycerols | HMDB10412 | 1.1 (1.25, 0.95)    | 3.6E-01 | 0.8 (0.99, 0.72) | 1.7E-01 |
| C58:7 TAG       | C8-pos | Triacylglycerols | HMDB05471 | 0.9 (1.05, 0.8)     | 3.6E-01 | 0.8 (0.94, 0.7)  | 5.0E-02 |
| C44:0 TAG       | C8-pos | Triacylglycerols | HMDB42063 | 1.1 (1.24, 0.95)    | 3.7E-01 | 0.9 (1, 0.73)    | 2.0E-01 |
| C50:3 TAG       | C8-pos | Triacylglycerols | HMDB05433 | 1.1 (1.25, 0.95)    | 3.7E-01 | 0.8 (0.93, 0.65) | 5.0E-02 |
| C52:7 TAG       | C8-pos | Triacylglycerols | HMDB10517 | 0.9 (1.05, 0.8)     | 3.7E-01 | 0.8 (0.9, 0.66)  | 2.1E-02 |
| C56:8 TAG       | C8-pos | Triacylglycerols | HMDB05392 | 0.9 (1.05, 0.81)    | 3.8E-01 | 0.8 (0.89, 0.66) | 1.7E-02 |
| C48:2 TAG       | C8-pos | Triacylglycerols | HMDB05376 | 1.1 (1.25, 0.95)    | 3.9E-01 | 0.8 (0.96, 0.69) | 1.1E-01 |
| C44:1 TAG       | C8-pos | Triacylglycerols | n/a       | 1.1 (1.24, 0.95)    | 4.1E-01 | 0.9 (1.01, 0.74) | 2.5E-01 |

| Metabolite.Name        | Method    | Category             | HMDB.ID   | Matching Adjustment |         | Full Adjustment  |         |
|------------------------|-----------|----------------------|-----------|---------------------|---------|------------------|---------|
|                        |           |                      |           | OR (95 CI%)         | FDR p   | OR (95 CI%)      | FDR p   |
| C42:0 TAG              | C8-pos    | Triacylglycerols     | n/a       | 1.1 (1.23, 0.95)    | 4.1E-01 | 0.9 (1.04, 0.77) | 4.0E-01 |
| C56:5 TAG              | C8-pos    | Triacylglycerols     | HMDB05406 | 1.1 (1.22, 0.94)    | 4.7E-01 | 0.8 (0.97, 0.7)  | 1.2E-01 |
| C46:2 TAG              | C8-pos    | Triacylglycerols     | HMDB10419 | 1.1 (1.23, 0.94)    | 4.8E-01 | 0.8 (0.97, 0.7)  | 1.3E-01 |
| C54:8 TAG              | C8-pos    | Triacylglycerols     | HMDB10518 | 0.9 (1.07, 0.82)    | 4.8E-01 | 0.8 (0.93, 0.69) | 4.8E-02 |
| C46:3 TAG              | C8-pos    | Triacylglycerols     | n/a       | 1.1 (1.22, 0.93)    | 5.1E-01 | 0.8 (0.97, 0.7)  | 1.2E-01 |
| C44:2 TAG              | C8-pos    | Triacylglycerols     | n/a       | 1.1 (1.21, 0.93)    | 5.2E-01 | 0.9 (1, 0.73)    | 1.9E-01 |
| C56:7 TAG              | C8-pos    | Triacylglycerols     | HMDB05462 | 0.9 (1.08, 0.83)    | 5.4E-01 | 0.8 (0.91, 0.67) | 2.6E-02 |
| C54:6 TAG              | C8-pos    | Triacylglycerols     | HMDB05391 | 1.1 (1.2, 0.92)     | 5.7E-01 | 0.8 (1, 0.72)    | 1.9E-01 |
| C48:3 TAG              | C8-pos    | Triacylglycerols     | HMDB05432 | 1.1 (1.21, 0.92)    | 5.9E-01 | 0.8 (0.92, 0.66) | 4.8E-02 |
| C48:4 TAG              | C8-pos    | Triacylglycerols     | n/a       | 1 (1.19, 0.91)      | 6.6E-01 | 0.8 (0.94, 0.67) | 6.3E-02 |
| C46:4 TAG              | C8-pos    | Triacylglycerols     | n/a       | 1 (1.18, 0.9)       | 6.8E-01 | 0.8 (0.97, 0.72) | 1.2E-01 |
| C48:5 TAG              | C8-pos    | Triacylglycerols     | n/a       | 1 (1.18, 0.91)      | 6.8E-01 | 0.8 (0.99, 0.73) | 1.8E-01 |
| C50:4 TAG              | C8-pos    | Triacylglycerols     | HMDB05435 | 1 (1.18, 0.9)       | 6.8E-01 | 0.7 (0.89, 0.62) | 2.1E-02 |
| C52:5 TAG              | C8-pos    | Triacylglycerols     | HMDB05380 | 1 (1.18, 0.91)      | 6.8E-01 | 0.8 (0.94, 0.68) | 6.3E-02 |
| C58:6 TAG              | C8-pos    | Triacylglycerols     | HMDB05458 | 1 (1.18, 0.91)      | 6.8E-01 | 0.8 (0.98, 0.72) | 1.6E-01 |
| C54:10 TAG             | C8-pos    | Triacylglycerols     | n/a       | 1 (1.11, 0.85)      | 6.9E-01 | 1 (1.13, 0.85)   | 8.6E-01 |
| C50:6 TAG              | C8-pos    | Triacylglycerols     | HMDB10497 | 1 (1.11, 0.85)      | 7.0E-01 | 0.8 (0.94, 0.69) | 5.0E-02 |
| C56:6 TAG              | C8-pos    | Triacylglycerols     | HMDB05456 | 1 (1.16, 0.9)       | 7.2E-01 | 0.8 (0.92, 0.67) | 3.7E-02 |
| C52:6 TAG              | C8-pos    | Triacylglycerols     | HMDB05436 | 1 (1.12, 0.86)      | 7.5E-01 | 0.7 (0.88, 0.63) | 1.7E-02 |
| C50:5 TAG              | C8-pos    | Triacylglycerols     | HMDB10471 | 1 (1.16, 0.88)      | 8.0E-01 | 0.8 (0.9, 0.64)  | 2.6E-02 |
| C54:7 TAG              | C8-pos    | Triacylglycerols     | HMDB05447 | 1 (1.14, 0.88)      | 8.5E-01 | 0.8 (0.95, 0.69) | 6.6E-02 |
| alpha-glycerophosphate | HILIC-neg | Acyl Phosphates      | HMDB00126 | 0.9 (1.02, 0.79)    | 2.2E-01 | 0.9 (1.01, 0.77) | 2.4E-01 |
| sorbitol               | HILIC-neg | Alcohols and Polyols | HMDB00247 | 1.3 (1.47, 1.12)    | 3.6E-03 | 1.1 (1.32, 0.99) | 2.5E-01 |
| inositol               | HILIC-neg | Alcohols and Polyols | HMDB00211 | 1.1 (1.31, 1)       | 1.4E-01 | 1.2 (1.37, 1.03) | 1.2E-01 |
| cystathionine          | HILIC-neg | Amino Acids          | HMDB00099 | 1.3 (1.44, 1.1)     | 7.5E-03 | 1.1 (1.31, 0.99) | 2.5E-01 |
| 2-aminoadipate         | HILIC-neg | Amino Acids          | HMDB00510 | 1.2 (1.35, 1.04)    | 4.8E-02 | 1 (1.19, 0.89)   | 8.4E-01 |

| Metabolite.Name            | Method    | Category           | HMDB.ID   | Matching Adjustment |         | Full Adjustment  |         |
|----------------------------|-----------|--------------------|-----------|---------------------|---------|------------------|---------|
|                            |           |                    |           | OR (95 CI%)         | FDR p   | OR (95 CI%)      | FDR p   |
| kynurenine                 | HILIC-neg | Amino Acids        | HMDB00684 | 1.2 (1.33, 1.02)    | 9.0E-02 | 1 (1.21, 0.9)    | 7.5E-01 |
| pantothenate               | HILIC-neg | Amino Acids        | HMDB00210 | 1 (1.1, 0.85)       | 6.8E-01 | 1 (1.16, 0.88)   | 9.0E-01 |
| hydroxyphenylacetate       | HILIC-neg | Aromatic Acids     | HMDB00020 | 1.2 (1.38, 1.06)    | 2.6E-02 | 1.2 (1.34, 1.01) | 1.7E-01 |
| gentisate                  | HILIC-neg | Aromatic Acids     | HMDB00152 | 1 (1.12, 0.86)      | 7.5E-01 | 1 (1.11, 0.84)   | 8.0E-01 |
| fructose/glucose/galactose | HILIC-neg | Carbohydrates      | HMDB00122 | 1.4 (1.56, 1.19)    | 3.0E-04 | 1.1 (1.25, 0.9)  | 6.9E-01 |
| sucrose                    | HILIC-neg | Carbohydrates      | HMDB00258 | 1.2 (1.42, 1.1)     | 8.5E-03 | 1.2 (1.33, 1.01) | 1.7E-01 |
| glucuronate                | HILIC-neg | Carbohydrates      | HMDB00127 | 1.2 (1.36, 1.04)    | 4.9E-02 | 1.1 (1.3, 0.98)  | 3.0E-01 |
| lactose                    | HILIC-neg | Carbohydrates      | HMDB00186 | 1.1 (1.22, 0.94)    | 4.3E-01 | 1.1 (1.24, 0.94) | 5.5E-01 |
| 2-hydroxyglutarate         | HILIC-neg | Dicarboxylic Acids | HMDB00694 | 1.3 (1.51, 1.16)    | 5.8E-04 | 1.2 (1.39, 1.05) | 6.6E-02 |
| fumarate/maleate           | HILIC-neg | Dicarboxylic Acids | HMDB00134 | 1.3 (1.44, 1.1)     | 8.1E-03 | 1.2 (1.35, 1.02) | 1.6E-01 |
| 3-methyladipate/pimelate   | HILIC-neg | Dicarboxylic Acids | HMDB00555 | 1.2 (1.39, 1.07)    | 2.2E-02 | 1.2 (1.39, 1.05) | 6.6E-02 |
| methylmalonate             | HILIC-neg | Dicarboxylic Acids | HMDB00202 | 1.2 (1.37, 1.04)    | 5.6E-02 | 1.2 (1.36, 1.01) | 1.7E-01 |
| malate                     | HILIC-neg | Dicarboxylic Acids | HMDB00156 | 1.1 (1.3, 1.01)     | 1.4E-01 | 1.1 (1.23, 0.94) | 5.8E-01 |
| succinate                  | HILIC-neg | Dicarboxylic Acids | HMDB00254 | 1.1 (1.26, 0.97)    | 2.9E-01 | 1.1 (1.26, 0.95) | 4.5E-01 |
| adipate                    | HILIC-neg | Dicarboxylic Acids | HMDB00448 | 1.1 (1.24, 0.96)    | 3.6E-01 | 1.1 (1.27, 0.96) | 4.1E-01 |
| oxalate                    | HILIC-neg | Dicarboxylic Acids | HMDB02329 | 1.1 (1.23, 0.95)    | 3.8E-01 | 1.1 (1.29, 0.98) | 3.2E-01 |
| alpha-ketoglutarate        | HILIC-neg | Dicarboxylic Acids | HMDB00208 | 1 (1.1, 0.85)       | 6.8E-01 | 1 (1.09, 0.83)   | 7.0E-01 |
| lactate                    | HILIC-neg | Hydroxy Acids      | HMDB00190 | 1.1 (1.29, 1)       | 1.6E-01 | 1 (1.14, 0.87)   | 9.2E-01 |
| alpha-hydroxybutyrate      | HILIC-neg | Hydroxy Acids      | HMDB00008 | 1.1 (1.25, 0.97)    | 3.0E-01 | 1 (1.14, 0.86)   | 9.2E-01 |
| beta-hydroxybutyrate       | HILIC-neg | Hydroxy Acids      | HMDB00011 | 1 (1.19, 0.92)      | 5.8E-01 | 1.1 (1.21, 0.92) | 6.8E-01 |
| 2-phosphoglycerate         | HILIC-neg | Organic acids      | HMDB00362 | 0.8 (0.95, 0.73)    | 3.5E-02 | 0.8 (0.94, 0.71) | 5.0E-02 |
| pyruvate                   | HILIC-neg | Organic acids      | HMDB00243 | 0.9 (0.99, 0.76)    | 1.3E-01 | 0.9 (1, 0.76)    | 2.2E-01 |
| phosphocreatine            | HILIC-neg | Other              | HMDB01511 | 0.7 (0.85, 0.64)    | 4.1E-04 | 0.8 (0.93, 0.69) | 3.7E-02 |
| indole-3-propionate        | HILIC-neg | Other              | HMDB02302 | 0.9 (1.02, 0.79)    | 2.5E-01 | 1 (1.16, 0.87)   | 9.2E-01 |
| indoxylsulfate             | HILIC-neg | Other              | HMDB00682 | 1.1 (1.26, 0.98)    | 2.5E-01 | 1.1 (1.28, 0.97) | 3.3E-01 |
| hippurate                  | HILIC-neg | Other              | HMDB00714 | 0.9 (1.08, 0.83)    | 5.6E-01 | 1 (1.14, 0.86)   | 8.9E-01 |

| Metabolite.Name           | Method    | Category                | HMDB.ID   | Matching Adjustment |         | Full Adjustment  |         |
|---------------------------|-----------|-------------------------|-----------|---------------------|---------|------------------|---------|
|                           |           |                         |           | OR (95 CI%)         | FDR p   | OR (95 CI%)      | FDR p   |
| 4-pyridoxate              | HILIC-neg | Other                   | HMDB00017 | 1 (1.09, 0.84)      | 6.2E-01 | 1 (1.19, 0.9)    | 8.0E-01 |
| salicylurate              | HILIC-neg | Other                   | HMDB00840 | 1 (1.15, 0.89)      | 8.1E-01 | 0.9 (1.09, 0.81) | 6.6E-01 |
| uracil                    | HILIC-neg | Purines and Pyrimidines | HMDB00300 | 0.7 (0.85, 0.66)    | 4.1E-04 | 0.8 (0.95, 0.72) | 6.3E-02 |
| uridine                   | HILIC-neg | Purines and Pyrimidines | HMDB00296 | 0.8 (0.86, 0.66)    | 5.3E-04 | 0.8 (0.94, 0.71) | 5.0E-02 |
| CMP                       | HILIC-neg | Purines and Pyrimidines | HMDB00095 | 1.3 (1.46, 1.13)    | 2.8E-03 | 1.2 (1.43, 1.09) | 2.7E-02 |
| inosine                   | HILIC-neg | Purines and Pyrimidines | HMDB00195 | 1.2 (1.35, 1.04)    | 5.7E-02 | 1.1 (1.27, 0.96) | 4.0E-01 |
| IMP                       | HILIC-neg | Purines and Pyrimidines | HMDB00175 | 0.9 (0.98, 0.75)    | 9.0E-02 | 0.9 (1.01, 0.77) | 2.5E-01 |
| urate                     | HILIC-neg | Purines and Pyrimidines | HMDB00289 | 1.2 (1.31, 1.01)    | 1.2E-01 | 1.1 (1.21, 0.92) | 6.8E-01 |
| thymine                   | HILIC-neg | Purines and Pyrimidines | HMDB00262 | 1.1 (1.28, 0.99)    | 2.0E-01 | 1.1 (1.23, 0.93) | 6.0E-01 |
| UDP-glucuronate           | HILIC-neg | Purines and Pyrimidines | HMDB00935 | 1.1 (1.25, 0.96)    | 3.3E-01 | 1.1 (1.25, 0.95) | 4.9E-01 |
| UMP                       | HILIC-neg | Purines and Pyrimidines | HMDB00288 | 1.1 (1.24, 0.96)    | 3.5E-01 | 1.1 (1.24, 0.94) | 5.2E-01 |
| UDP-galactose/UDP-glucose | HILIC-neg | Purines and Pyrimidines | HMDB00286 | 1.1 (1.23, 0.95)    | 4.1E-01 | 1.1 (1.24, 0.94) | 5.2E-01 |
| cytidine                  | HILIC-neg | Purines and Pyrimidines | HMDB00089 | 1.1 (1.22, 0.94)    | 4.7E-01 | 1 (1.2, 0.91)    | 7.4E-01 |
| UDP                       | HILIC-neg | Purines and Pyrimidines | HMDB00295 | 1.1 (1.22, 0.94)    | 4.8E-01 | 1 (1.19, 0.9)    | 7.7E-01 |
| hypoxanthine              | HILIC-neg | Purines and Pyrimidines | HMDB00157 | 0.9 (1.07, 0.83)    | 5.0E-01 | 0.9 (1.03, 0.78) | 3.3E-01 |
| cAMP                      | HILIC-neg | Purines and Pyrimidines | HMDB00058 | 0.9 (1.07, 0.83)    | 5.1E-01 | 0.9 (1.08, 0.82) | 6.6E-01 |
| GMP                       | HILIC-neg | Purines and Pyrimidines | HMDB01397 | 1.1 (1.2, 0.93)     | 5.4E-01 | 1.1 (1.23, 0.94) | 5.8E-01 |
| AMP                       | HILIC-neg | Purines and Pyrimidines | HMDB00045 | 1 (1.19, 0.92)      | 6.0E-01 | 1.1 (1.21, 0.92) | 6.8E-01 |
| ADP                       | HILIC-neg | Purines and Pyrimidines | HMDB01341 | 1 (1.11, 0.85)      | 6.9E-01 | 1 (1.13, 0.86)   | 8.9E-01 |

| Metabolite.Name       | Method    | Category                | HMDB.ID   | Matching Adjustment |         | Full Adjustment  |         |
|-----------------------|-----------|-------------------------|-----------|---------------------|---------|------------------|---------|
|                       |           |                         |           | OR (95 CI%)         | FDR p   | OR (95 CI%)      | FDR p   |
| OR (95 CI%)           | FDR p     | Purines and Pyrimidines | HMDB01201 | 1 (1.12, 0.87)      | 7.7E-01 | 1 (1.14, 0.87)   | 9.2E-01 |
| xanthine              | HILIC-neg | Purines and Pyrimidines | HMDB00292 | 1 (1.15, 0.89)      | 8.0E-01 | 0.9 (1.07, 0.81) | 6.0E-01 |
| xanthurenate          | HILIC-neg | Purines and Pyrimidines | HMDB00881 | 1 (1.14, 0.88)      | 8.4E-01 | 1 (1.1, 0.84)    | 7.5E-01 |
| hexose monophosphate  | HILIC-neg | Sugar Phosphates        | HMDB00124 | 1.1 (1.26, 0.98)    | 2.5E-01 | 1.1 (1.21, 0.92) | 6.8E-01 |
| hexose diphosphate    | HILIC-neg | Sugar Phosphates        | HMDB01058 | 0.9 (1.05, 0.81)    | 3.7E-01 | 0.9 (1.07, 0.81) | 5.7E-01 |
| pentose monophosphate | HILIC-neg | Sugar Phosphates        | HMDB01548 | 1.1 (1.23, 0.95)    | 4.1E-01 | 1.1 (1.24, 0.95) | 5.1E-01 |
| 6-phosphogluconate    | HILIC-neg | Sugar Phosphates        | HMDB01316 | 1.1 (1.22, 0.94)    | 4.5E-01 | 1.1 (1.25, 0.95) | 4.9E-01 |
| isocitrate            | HILIC-neg | Tricarboxylic Acids     | HMDB00193 | 1.2 (1.37, 1.05)    | 3.5E-02 | 1.1 (1.23, 0.93) | 6.1E-01 |
| aconitate             | HILIC-neg | Tricarboxylic Acids     | HMDB00072 | 1.1 (1.3, 1)        | 1.6E-01 | 1 (1.19, 0.9)    | 7.7E-01 |
| citrate               | HILIC-neg | Tricarboxylic Acids     | HMDB00094 | 1 (1.11, 0.86)      | 7.2E-01 | 1 (1.15, 0.88)   | 9.2E-01 |
| C4-OH carnitine       | HILIC-pos | Acylcarnitines          | HMDB13127 | 1.2 (1.4, 1.07)     | 2.0E-02 | 1.1 (1.27, 0.96) | 4.2E-01 |
| C18 carnitine         | HILIC-pos | Acylcarnitines          | HMDB00848 | 1.1 (1.31, 1)       | 1.7E-01 | 1.1 (1.28, 0.96) | 4.2E-01 |
| C26 carnitine         | HILIC-pos | Acylcarnitines          | HMDB06347 | 1.1 (1.28, 0.99)    | 1.9E-01 | 1 (1.21, 0.9)    | 7.5E-01 |
| C3 carnitine          | HILIC-pos | Acylcarnitines          | HMDB00824 | 1.1 (1.28, 0.99)    | 2.0E-01 | 1 (1.2, 0.9)     | 7.7E-01 |
| C14 carnitine         | HILIC-pos | Acylcarnitines          | HMDB05066 | 1.1 (1.24, 0.95)    | 3.8E-01 | 1 (1.18, 0.89)   | 8.4E-01 |
| C5 carnitine          | HILIC-pos | Acylcarnitines          | HMDB00688 | 1.1 (1.22, 0.94)    | 4.7E-01 | 1 (1.1, 0.83)    | 7.5E-01 |
| C10 carnitine         | HILIC-pos | Acylcarnitines          | HMDB00651 | 0.9 (1.07, 0.82)    | 4.9E-01 | 0.9 (1.07, 0.82) | 6.1E-01 |
| C5-DC carnitine       | HILIC-pos | Acylcarnitines          | HMDB13130 | 1.1 (1.21, 0.93)    | 5.1E-01 | 1 (1.18, 0.9)    | 8.4E-01 |
| C2 carnitine          | HILIC-pos | Acylcarnitines          | HMDB00201 | 1.1 (1.2, 0.93)     | 5.2E-01 | 1.1 (1.22, 0.93) | 6.4E-01 |
| C18:1-OH carnitine    | HILIC-pos | Acylcarnitines          | HMDB13339 | 1.1 (1.21, 0.93)    | 5.3E-01 | 1 (1.18, 0.89)   | 8.4E-01 |
| C8 carnitine          | HILIC-pos | Acylcarnitines          | HMDB00791 | 0.9 (1.08, 0.83)    | 5.5E-01 | 0.9 (1.07, 0.82) | 6.0E-01 |
| C9 carnitine          | HILIC-pos | Acylcarnitines          | HMDB13288 | 0.9 (1.08, 0.83)    | 5.6E-01 | 0.9 (1.06, 0.8)  | 5.1E-01 |
| C16 carnitine         | HILIC-pos | Acylcarnitines          | HMDB00222 | 1.1 (1.2, 0.92)     | 5.7E-01 | 1 (1.13, 0.85)   | 8.6E-01 |
| C3-DC-CH3 carnitine   | HILIC-pos | Acylcarnitines          | HMDB13133 | 1 (1.09, 0.84)      | 5.8E-01 | 0.9 (1.03, 0.76) | 3.3E-01 |
| C10:2 carnitine       | HILIC-pos | Acylcarnitines          | HMDB13325 | 1 (1.2, 0.92)       | 5.9E-01 | 1 (1.15, 0.87)   | 9.3E-01 |

| Metabolite.Name      | Method    | Category       | HMDB.ID   | Matching Adjustment |         | Full Adjustment  |         |
|----------------------|-----------|----------------|-----------|---------------------|---------|------------------|---------|
|                      |           |                |           | OR (95 CI%)         | FDR p   | OR (95 CI%)      | FDR p   |
| C12 carnitine        | HILIC-pos | Acylcarnitines | HMDB02250 | 1 (1.19, 0.92)      | 5.9E-01 | 1 (1.19, 0.9)    | 8.0E-01 |
| C14:1 carnitine      | HILIC-pos | Acylcarnitines | HMDB02014 | 1 (1.19, 0.92)      | 6.0E-01 | 1 (1.2, 0.91)    | 7.5E-01 |
| C7 carnitine         | HILIC-pos | Acylcarnitines | HMDB13238 | 1 (1.19, 0.91)      | 6.2E-01 | 1 (1.14, 0.87)   | 9.2E-01 |
| C4 carnitine         | HILIC-pos | Acylcarnitines | HMDB02013 | 1 (1.18, 0.91)      | 6.3E-01 | 1 (1.13, 0.86)   | 8.6E-01 |
| C18:1 carnitine      | HILIC-pos | Acylcarnitines | HMDB05065 | 1 (1.19, 0.91)      | 6.6E-01 | 1 (1.18, 0.89)   | 8.5E-01 |
| C12:1 carnitine      | HILIC-pos | Acylcarnitines | HMDB13326 | 1 (1.17, 0.9)       | 6.9E-01 | 1 (1.16, 0.88)   | 8.9E-01 |
| C18:2 carnitine      | HILIC-pos | Acylcarnitines | HMDB06469 | 1 (1.11, 0.85)      | 7.0E-01 | 1 (1.12, 0.85)   | 8.4E-01 |
| C20 carnitine        | HILIC-pos | Acylcarnitines | HMDB06460 | 1 (1.17, 0.9)       | 7.2E-01 | 1 (1.2, 0.91)    | 7.5E-01 |
| C5:1 carnitine       | HILIC-pos | Acylcarnitines | HMDB02366 | 1 (1.16, 0.9)       | 7.3E-01 | 1 (1.16, 0.88)   | 8.9E-01 |
| C6 carnitine         | HILIC-pos | Acylcarnitines | HMDB00705 | 1 (1.15, 0.89)      | 7.7E-01 | 1 (1.1, 0.84)    | 7.5E-01 |
| C14:2 carnitine      | HILIC-pos | Acylcarnitines | HMDB13331 | 1 (1.15, 0.88)      | 8.0E-01 | 1 (1.16, 0.88)   | 9.2E-01 |
| glutamate            | HILIC-pos | Amino Acids    | HMDB00148 | 1.6 (1.8, 1.36)     | 1.9E-08 | 1.4 (1.6, 1.18)  | 5.5E-03 |
| asparagine           | HILIC-pos | Amino Acids    | HMDB00168 | 0.6 (0.74, 0.56)    | 3.6E-08 | 0.8 (0.87, 0.64) | 1.1E-02 |
| glutamine            | HILIC-pos | Amino Acids    | HMDB00641 | 0.7 (0.77, 0.58)    | 1.2E-06 | 0.7 (0.87, 0.64) | 1.1E-02 |
| methionine           | HILIC-pos | Amino Acids    | HMDB00696 | 0.7 (0.85, 0.65)    | 3.0E-04 | 0.8 (0.88, 0.66) | 1.1E-02 |
| histidine            | HILIC-pos | Amino Acids    | HMDB00177 | 0.7 (0.86, 0.65)    | 5.8E-04 | 0.8 (0.95, 0.71) | 6.6E-02 |
| threonine            | HILIC-pos | Amino Acids    | HMDB00167 | 0.8 (0.86, 0.66)    | 5.8E-04 | 0.8 (0.95, 0.71) | 6.1E-02 |
| serine               | HILIC-pos | Amino Acids    | HMDB00187 | 0.8 (0.9, 0.68)     | 4.2E-03 | 0.9 (1.01, 0.76) | 2.5E-01 |
| glycine              | HILIC-pos | Amino Acids    | HMDB00123 | 0.8 (0.91, 0.69)    | 6.7E-03 | 0.9 (1.07, 0.8)  | 5.7E-01 |
| lysine               | HILIC-pos | Amino Acids    | HMDB00182 | 0.8 (0.91, 0.7)     | 8.7E-03 | 0.8 (0.92, 0.69) | 2.7E-02 |
| 1-methylhistamine    | HILIC-pos | Amino Acids    | HMDB00898 | 0.8 (0.93, 0.7)     | 1.4E-02 | 0.8 (0.94, 0.71) | 5.0E-02 |
| tryptophan           | HILIC-pos | Amino Acids    | HMDB00929 | 0.8 (0.96, 0.74)    | 5.6E-02 | 0.9 (0.99, 0.75) | 1.8E-01 |
| dimethylglycine      | HILIC-pos | Amino Acids    | HMDB00092 | 1.2 (1.34, 1.03)    | 8.2E-02 | 1.1 (1.26, 0.95) | 4.9E-01 |
| arginine             | HILIC-pos | Amino Acids    | HMDB00517 | 0.9 (1.01, 0.78)    | 1.8E-01 | 1 (1.11, 0.84)   | 7.9E-01 |
| creatine             | HILIC-pos | Amino Acids    | HMDB00064 | 0.9 (1.01, 0.78)    | 2.0E-01 | 0.9 (1.08, 0.81) | 6.1E-01 |
| methionine sulfoxide | HILIC-pos | Amino Acids    | HMDB02005 | 1.1 (1.28, 0.98)    | 2.1E-01 | 1.2 (1.34, 1.02) | 1.5E-01 |

| Metabolite.Name          | Method    | Category                       | HMDB.ID   | Matching Adjustment |         | Full Adjustment  |         |
|--------------------------|-----------|--------------------------------|-----------|---------------------|---------|------------------|---------|
|                          |           |                                |           | OR (95 CI%)         | FDR p   | OR (95 CI%)      | FDR p   |
| pipecolic acid           | HILIC-pos | Amino Acids                    | HMDB00716 | 0.9 (1.02, 0.79)    | 2.4E-01 | 0.9 (1.03, 0.78) | 3.7E-01 |
| isoleucine               | HILIC-pos | Amino Acids                    | HMDB00172 | 1.1 (1.23, 0.95)    | 4.1E-01 | 0.9 (0.99, 0.74) | 1.7E-01 |
| aminoisobutyric acid     | HILIC-pos | Amino Acids                    | HMDB01906 | 0.9 (1.06, 0.82)    | 4.4E-01 | 0.9 (1.09, 0.83) | 6.8E-01 |
| pyroglutamic acid        | HILIC-pos | Amino Acids                    | HMDB00267 | 1.1 (1.22, 0.94)    | 4.8E-01 | 1.1 (1.23, 0.93) | 6.1E-01 |
| taurine                  | HILIC-pos | Amino Acids                    | HMDB00251 | 0.9 (1.07, 0.83)    | 5.1E-01 | 1 (1.12, 0.85)   | 8.5E-01 |
| phenylalanine            | HILIC-pos | Amino Acids                    | HMDB00159 | 0.9 (1.07, 0.83)    | 5.2E-01 | 0.9 (1.01, 0.76) | 2.5E-01 |
| leucine                  | HILIC-pos | Amino Acids                    | HMDB00687 | 1 (1.08, 0.84)      | 5.8E-01 | 0.8 (0.92, 0.69) | 2.7E-02 |
| SDMA                     | HILIC-pos | Amino Acids                    | HMDB03334 | 1 (1.09, 0.84)      | 6.1E-01 | 1 (1.19, 0.89)   | 8.4E-01 |
| ornithine                | HILIC-pos | Amino Acids                    | HMDB00214 | 1 (1.17, 0.91)      | 6.8E-01 | 1 (1.15, 0.88)   | 9.2E-01 |
| valine                   | HILIC-pos | Amino Acids                    | HMDB00883 | 1 (1.17, 0.9)       | 6.9E-01 | 0.8 (0.94, 0.7)  | 5.0E-02 |
| proline                  | HILIC-pos | Amino Acids                    | HMDB00162 | 1 (1.16, 0.9)       | 7.1E-01 | 0.9 (1.05, 0.79) | 4.6E-01 |
| alanine                  | HILIC-pos | Amino Acids                    | HMDB00161 | 1 (1.12, 0.86)      | 7.4E-01 | 0.9 (1, 0.75)    | 2.3E-01 |
| hydroxyproline           | HILIC-pos | Amino Acids                    | HMDB00725 | 1 (1.12, 0.86)      | 7.5E-01 | 0.9 (1.09, 0.83) | 6.8E-01 |
| tyrosine                 | HILIC-pos | Amino Acids                    | HMDB00158 | 1 (1.12, 0.87)      | 7.7E-01 | 0.9 (1.04, 0.79) | 4.1E-01 |
| citrulline               | HILIC-pos | Amino Acids                    | HMDB00904 | 1 (1.14, 0.88)      | 8.5E-01 | 1.1 (1.23, 0.93) | 6.2E-01 |
| allantoin                | HILIC-pos | Amino Ketones                  | HMDB00462 | 1.1 (1.31, 1.01)    | 1.3E-01 | 1.1 (1.32, 0.99) | 2.5E-01 |
| cotinine                 | HILIC-pos | Amino Ketones                  | HMDB01046 | 1.1 (1.26, 0.97)    | 2.6E-01 | 1 (1.23, 0.86)   | 8.5E-01 |
| creatinine               | HILIC-pos | Amino Ketones                  | HMDB00562 | 1 (1.19, 0.92)      | 5.9E-01 | 1.1 (1.23, 0.93) | 6.0E-01 |
| serotonin                | HILIC-pos | Indoles and Indole Derivatives | HMDB00259 | 0.9 (1.05, 0.81)    | 3.6E-01 | 1 (1.1, 0.83)    | 7.5E-01 |
| kynurenic acid           | HILIC-pos | Indoles and Indole Derivatives | HMDB00715 | 1.1 (1.21, 0.94)    | 4.8E-01 | 0.9 (1.09, 0.82) | 6.8E-01 |
| 5-hydroxytryptophan      | HILIC-pos | Indoles and Indole Derivatives | HMDB00472 | 0.9 (1.07, 0.82)    | 4.8E-01 | 0.9 (1.04, 0.79) | 4.2E-01 |
| 1-methylnicotinamide     | HILIC-pos | Other                          | HMDB00699 | 0.8 (0.97, 0.74)    | 6.5E-02 | 0.9 (1.03, 0.78) | 3.5E-01 |
| thyroxine                | HILIC-pos | Other                          | HMDB00248 | 0.9 (1, 0.77)       | 1.6E-01 | 0.9 (1.01, 0.76) | 2.5E-01 |
| NMMA                     | HILIC-pos | Other                          | HMDB29416 | 0.9 (1.02, 0.78)    | 2.2E-01 | 0.9 (1.05, 0.8)  | 4.6E-01 |
| N-carbamoyl-beta-alanine | HILIC-pos | Other                          | HMDB00026 | 1.1 (1.27, 0.97)    | 2.5E-01 | 1.1 (1.23, 0.93) | 6.1E-01 |



| Metabolite.Name             | Method    | Category                | HMDB.ID   | Matching Adjustment |         | Full Adjustment  |         |
|-----------------------------|-----------|-------------------------|-----------|---------------------|---------|------------------|---------|
|                             |           |                         |           | OR (95 CI%)         | FDR p   | OR (95 CI%)      | FDR p   |
| histamine                   | HILIC-pos | Other                   | HMDB00870 | 0.9 (1.03, 0.79)    | 2.8E-01 | 0.9 (1.04, 0.79) | 4.2E-01 |
| trimethylamine-N-oxide      | HILIC-pos | Other                   | HMDB00925 | 1.1 (1.23, 0.95)    | 3.8E-01 | 1 (1.17, 0.89)   | 8.8E-01 |
| thiamine                    | HILIC-pos | Other                   | HMDB00235 | 0.9 (1.07, 0.82)    | 5.1E-01 | 1 (1.17, 0.88)   | 8.9E-01 |
| carosine                    | HILIC-pos | Other                   | HMDB00033 | 1 (1.09, 0.84)      | 6.1E-01 | 1 (1.11, 0.85)   | 8.4E-01 |
| niacinamide                 | HILIC-pos | Other                   | HMDB01406 | 1 (1.13, 0.88)      | 8.4E-01 | 1 (1.14, 0.87)   | 9.2E-01 |
| putrescine                  | HILIC-pos | Polyamines              | HMDB01414 | 0.9 (1.05, 0.81)    | 3.7E-01 | 1 (1.13, 0.85)   | 8.6E-01 |
| xanthosine                  | HILIC-pos | Purines and Pyrimidines | HMDB00299 | 0.8 (0.9, 0.68)     | 3.7E-03 | 0.9 (1.02, 0.74) | 2.6E-01 |
| cytosine                    | HILIC-pos | Purines and Pyrimidines | HMDB00630 | 1.2 (1.35, 1.01)    | 1.1E-01 | 1.1 (1.29, 0.95) | 4.0E-01 |
| adenosine                   | HILIC-pos | Purines and Pyrimidines | HMDB00050 | 0.9 (1.05, 0.81)    | 3.7E-01 | 1 (1.11, 0.84)   | 7.7E-01 |
| sarcosine                   | HILIC-pos | Quaternary Amines       | HMDB00271 | 0.8 (0.96, 0.74)    | 4.9E-02 | 0.9 (0.99, 0.74) | 1.6E-01 |
| betaine                     | HILIC-pos | Quaternary Amines       | HMDB00043 | 1 (1.18, 0.9)       | 6.8E-01 | 1 (1.2, 0.9)     | 7.6E-01 |
| butyrobetaine               | HILIC-pos | Quaternary Amines       | HMDB01161 | 1 (1.1, 0.85)       | 6.8E-01 | 1 (1.14, 0.87)   | 9.2E-01 |
| carnitine                   | HILIC-pos | Quaternary Amines       | HMDB00062 | 1 (1.11, 0.86)      | 7.0E-01 | 1 (1.14, 0.86)   | 8.9E-01 |
| phosphocholine              | HILIC-pos | Quaternary Amines       | HMDB01565 | 1 (1.11, 0.86)      | 7.1E-01 | 1 (1.17, 0.89)   | 8.6E-01 |
| choline                     | HILIC-pos | Quaternary Amines       | HMDB00097 | 1 (1.15, 0.89)      | 8.0E-01 | 0.9 (1.09, 0.83) | 6.8E-01 |
| alpha-glycerophosphocholine | HILIC-pos | Quaternary Amines       | HMDB00086 | 1 (1.14, 0.88)      | 8.2E-01 | 1 (1.15, 0.87)   | 9.3E-01 |

**Supplemental Table 2.** Logistic regression results in the validation WHI-HT dataset for all discovered markers

| Metabolite           | WHI-HT<br>Adjust for matching* |          | WHI-HT<br>Adjusted for risk factors† |         |
|----------------------|--------------------------------|----------|--------------------------------------|---------|
|                      | Odds Ratio‡                    | P- Value | Odds Ratio‡                          | P-value |
| C34:2 hydroxy-PC     | 1.83 (1.54 ,2.17)              | 5.4E-13  | 1.76 (1.47 ,2.1)                     | 2.5E-10 |
| 15-HETE              | 1.73 (1.44 ,2.07)              | 2.3E-10  | 1.65 (1.36 ,1.99)                    | 5.6E-08 |
| 5-HETE               | 1.71 (1.43 ,2.04)              | 3.0E-10  | 1.65 (1.37 ,1.99)                    | 2.6E-08 |
| 11-HETE              | 1.68 (1.41 ,2)                 | 9.0E-10  | 1.64 (1.36 ,1.97)                    | 4.3E-08 |
| C36:4 hydroxy-PC     | 1.66 (1.39 ,1.99)              | 2.4E-09  | 1.56 (1.3 ,1.87)                     | 7.0E-07 |
| 12-HETE              | 1.64 (1.38 ,1.95)              | 3.9E-09  | -                                    | -       |
| glutamate            | 1.64 (1.38 ,1.95)              | 5.5E-09  | 1.5 (1.25 ,1.8)                      | 8.3E-06 |
| glutamine            | 0.61 (0.5 ,0.73)               | 1.4E-08  | 0.67 (0.55 ,0.82)                    | 2.5E-05 |
| 2-hydroxyglutarate   | 1.45 (1.22 ,1.72)              | 1.0E-05  | -                                    | -       |
| C52:0 TAG            | 1.42 (1.2 ,1.67)               | 2.5E-05  | -                                    | -       |
| glucose              | 1.42 (1.19 ,1.69)              | 3.4E-05  | -                                    | -       |
| C36:1 DAG            | 1.41 (1.19 ,1.67)              | 3.9E-05  | -                                    | -       |
| C34:1 DAG            | 1.4 (1.18 ,1.65)               | 5.9E-05  | -                                    | -       |
| sucrose              | 1.4 (1.18 ,1.65)               | 7.2E-05  | -                                    | -       |
| C52:1 TAG            | 1.38 (1.17 ,1.63)              | 8.1E-05  | -                                    | -       |
| CMP                  | 1.38 (1.17 ,1.63)              | 1.1E-04  | 1.33 (1.11 ,1.59)                    | 1.4E-03 |
| C50:0 TAG            | 1.37 (1.16 ,1.61)              | 1.4E-04  | -                                    | -       |
| C54:2 TAG            | 1.36 (1.15 ,1.6)               | 2.0E-04  | -                                    | -       |
| C54:1 TAG            | 1.34 (1.14 ,1.58)              | 3.3E-04  | -                                    | -       |
| C56:2 TAG            | 1.34 (1.14 ,1.59)              | 3.4E-04  | -                                    | -       |
| C50:1 TAG            | 1.34 (1.14 ,1.58)              | 3.6E-04  | -                                    | -       |
| asparagine           | 0.75 (0.64 ,0.88)              | 4.2E-04  | 0.87 (0.73 ,1.05)                    | 1.4E-01 |
| C52:2 TAG            | 1.32 (1.12 ,1.55)              | 7.8E-04  | -                                    | -       |
| C36:2 DAG            | 1.31 (1.11 ,1.54)              | 1.3E-03  | -                                    | -       |
| sorbitol             | 1.28 (1.08 ,1.51)              | 3.4E-03  | -                                    | -       |
| C34:0 DAG            | 1.26 (1.06 ,1.49)              | 6.5E-03  | -                                    | -       |
| uracil               | 0.8 (0.68 ,0.94)               | 6.5E-03  | -                                    | -       |
| C54:3 TAG            | 1.25 (1.06 ,1.47)              | 6.7E-03  | -                                    | -       |
| xanthosine           | 0.8 (0.68 ,0.95)               | 7.5E-03  | -                                    | -       |
| C56:3 TAG            | 1.23 (1.05 ,1.45)              | 1.2E-02  | -                                    | -       |
| C40:10 PC            | 0.82 (0.7 ,0.97)               | 1.8E-02  | -                                    | -       |
| fumarate/maleate     | 1.22 (1.03 ,1.44)              | 2.1E-02  | -                                    | -       |
| isocitrate           | 1.21 (1.02 ,1.42)              | 2.4E-02  | -                                    | -       |
| hydroxyphenylacetate | 1.17 (1 ,1.38)                 | 5.2E-02  | -                                    | -       |

| Metabolite               | WHI-HT<br>Adjust for matching* |          | WHI-HT<br>Adjusted for risk factors† |         |
|--------------------------|--------------------------------|----------|--------------------------------------|---------|
|                          | Odds Ratio‡                    | P- Value | Odds Ratio‡                          | P-value |
| uridine                  | 0.86 (0.73 ,1)                 | 5.5E-02  | 0.93 (0.78 ,1.1)                     | 3.8E-01 |
| glycine                  | 0.85 (0.73 ,1)                 | 5.5E-02  | -                                    | -       |
| histidine                | 0.86 (0.73 ,1.01)              | 0.073    | -                                    | -       |
| glycodeoxycholate        | 1.14 (0.97 ,1.34)              | 0.108    | -                                    | -       |
| 3-methyladipate/pimelate | 1.14 (0.97 ,1.34)              | 0.108    | -                                    | -       |
| serine                   | 0.88 (0.75 ,1.04)              | 0.131    | -                                    | -       |
| cystathionine            | 1.13 (0.96 ,1.32)              | 0.134    | -                                    | -       |
| 1-methylhistamine        | 0.89 (0.76 ,1.04)              | 0.14     | 0.91 (0.77 ,1.08)                    | 2.7E-01 |
| LTB4                     | 1.12 (0.95 ,1.31)              | 0.171    | -                                    | -       |
| 2-phosphoglycerate       | 0.9 (0.76 ,1.05)               | 0.176    | 0.9 (0.76 ,1.06)                     | 2.1E-01 |
| C40:9 PC                 | 0.91 (0.77 ,1.07)              | 0.233    | -                                    | -       |
| C4-OH carnitine          | 1.1 (0.94 ,1.29)               | 0.251    | -                                    | -       |
| glucuronate              | 1.09 (0.93 ,1.28)              | 0.271    | -                                    | -       |
| C34:3 PC plasmalogen     | 0.92 (0.78 ,1.08)              | 0.286    | -                                    | -       |
| C38:7 PC plasmalogen     | 0.93 (0.79 ,1.09)              | 0.368    | -                                    | -       |
| C38:6 PC                 | 0.93 (0.79 ,1.1)               | 0.409    | -                                    | -       |
| phosphocreatine          | 0.94 (0.8 ,1.1)                | 0.46     | 1.04 (0.87 ,1.23)                    | 6.9E-01 |
| threonine                | 1.06 (0.9 ,1.25)               | 0.461    | -                                    | -       |
| C56:10 TAG               | 1.05 (0.9 ,1.24)               | 0.514    | 1.04 (0.87 ,1.24)                    | 6.5E-01 |
| sarcosine                | 0.95 (0.81 ,1.12)              | 0.566    | -                                    | -       |
| docosahexaenoic acid     | 1.04 (0.89 ,1.23)              | 0.607    | -                                    | -       |
| C58:11 TAG               | 0.96 (0.82 ,1.13)              | 0.611    | 0.93 (0.78 ,1.11)                    | 4.2E-01 |
| lysine                   | 0.98 (0.83 ,1.15)              | 0.789    | 1.02 (0.85 ,1.22)                    | 8.3E-01 |
| methionine               | 0.98 (0.84 ,1.15)              | 0.816    | 1.07 (0.9 ,1.27)                     | 4.3E-01 |
| C22:6 LPE                | 1.02 (0.87 ,1.19)              | 0.842    | -                                    | -       |
| 2-aminoadipate           | 1.01 (0.87 ,1.19)              | 0.861    | -                                    | -       |
| C34:3 DAG                | -                              | -        | 0.96 (0.76 ,1.2)                     | 7.0E-01 |
| C48:3 TAG                | -                              | -        | 1.02 (0.83 ,1.27)                    | 8.2E-01 |
| C50:3 TAG                | -                              | -        | 1 (0.79 ,1.25)                       | 9.7E-01 |
| C50:4 TAG                | -                              | -        | 0.97 (0.78 ,1.21)                    | 7.7E-01 |
| C50:5 TAG                | -                              | -        | 1 (0.81 ,1.23)                       | 9.9E-01 |
| C50:6 TAG                | -                              | -        | 1.03 (0.86 ,1.24)                    | 7.4E-01 |
| C52:6 TAG                | -                              | -        | 0.94 (0.76 ,1.15)                    | 5.5E-01 |
| C52:7 TAG                | -                              | -        | 0.94 (0.78 ,1.14)                    | 5.5E-01 |
| C54:8 TAG                | -                              | -        | 0.89 (0.73 ,1.07)                    | 2.0E-01 |
| C56:6 TAG                | -                              | -        | 0.88 (0.72 ,1.08)                    | 2.1E-01 |

| <b>Metabolite</b> | <b>WHI-HT<br/>Adjust for matching*</b> |          | <b>WHI-HT<br/>Adjusted for risk factors†</b> |         |
|-------------------|----------------------------------------|----------|----------------------------------------------|---------|
|                   | Odds Ratio‡                            | P- Value | Odds Ratio‡                                  | P-value |
| C56:7 TAG         | -                                      | -        | 0.86 (0.7 ,1.04)                             | 1.2E-01 |
| C56:8 TAG         | -                                      | -        | 0.87 (0.71 ,1.05)                            | 1.5E-01 |
| C56:9 TAG         | -                                      | -        | 0.91 (0.75 ,1.1)                             | 3.4E-01 |
| C58:10 TAG        | -                                      | -        | 0.9 (0.75 ,1.09)                             | 2.9E-01 |
| C58:7 TAG         | -                                      | -        | 0.84 (0.7 ,1.01)                             | 6.4E-02 |
| C58:8 TAG         | -                                      | -        | 0.86 (0.71 ,1.03)                            | 1.0E-01 |
| C58:9 TAG         | -                                      | -        | 0.87 (0.73 ,1.05)                            | 1.5E-01 |
| leucine           | -                                      | -        | 0.93 (0.78 ,1.11)                            | 4.2E-01 |
| valine            | -                                      | -        | 1 (0.84 ,1.21)                               | 9.6E-01 |

\* adjusted for baseline age, race/ethnicity, hysterectomy status, and enrollment window

† adjusted for baseline age, race/ethnicity, hysterectomy status, enrollment window, aspirin use, statin use, anti-diabetic use, anti-hypertensive use, smoking, systolic blood pressure, diabetes, total and HDL cholesterol.

‡ odds ratios are per 1 standard deviation of log transformed value

**Supplemental Table 3.** CVs and number below the limit of detection for validated markers

| <b>Metabolite</b>  | <b>Coefficient of Variation*</b> | <b>Percent below the limit of detection</b> |
|--------------------|----------------------------------|---------------------------------------------|
| 11-HETE            | -                                | 0%                                          |
| 12-HETE            | 9.6                              | 0%                                          |
| 15-HETE            | 10.3                             | 0%                                          |
| 2-hydroxyglutarate | 7.5                              | 0%                                          |
| 5-HETE             | 9.7                              | 0%                                          |
| asparagine         | 5.4                              | 0%                                          |
| C34:0 DAG          | 4.8                              | 0%                                          |
| C34:1 DAG          | 3.1                              | 0%                                          |
| C34:2 hydroxy-PC   | 12.9                             | 19%                                         |
| C36:1 DAG          | 3.7                              | 0%                                          |
| C36:2 DAG          | 3.0                              | 0%                                          |
| C36:4 hydroxy-PC   | 8.9                              | 2%                                          |
| C40:10 PC          | 6.0                              | 0%                                          |
| C50:0 TAG          | 4.9                              | 0%                                          |
| C50:1 TAG          | 3.5                              | 0%                                          |
| C52:0 TAG          | 6.7                              | 0%                                          |
| C52:1 TAG          | 4.2                              | 0%                                          |
| C52:2 TAG          | 3.9                              | 0%                                          |
| C54:1 TAG          | 5.8                              | 0%                                          |
| C54:2 TAG          | 4.2                              | 0%                                          |
| C54:3 TAG          | 4.3                              | 0%                                          |
| C56:2 TAG          | 23.7                             | 0%                                          |
| C56:3 TAG          | 10.1                             | 0%                                          |
| CMP                | 58.1                             | 21%                                         |
| fumarate/maleate   | 12.3                             | 0%                                          |
| glucose            | 3.5                              | 0%                                          |
| glutamate          | 4.4                              | 0%                                          |
| glutamine          | 6.2                              | 0%                                          |
| isocitrate         | 6.8                              | 0%                                          |
| sorbitol           | 3.9                              | 0%                                          |
| sucrose            | 10.5                             | 0%                                          |
| uracil             | 8.8                              | 0%                                          |
| xanthosine         | 33.8                             | 0%                                          |

\*Calculated using pooled plasma samples

**Supplemental Table 4.** Baseline characteristics for the PREDIMED replication cohort.

|                                      | Sub-cohort *<br>(n=787) | Cases<br>(n=230) | P-value† |
|--------------------------------------|-------------------------|------------------|----------|
| Intervention group, %                |                         |                  |          |
| Control                              | 234 (29.7)              | 83 (36.1)        | 0.15     |
| Mediterranean diet + EVOO            | 291 (37.0)              | 82 (35.7)        |          |
| Mediterranean diet + Nuts            | 262 (33.3)              | 65 (28.3)        |          |
| Women, %                             | 450 (57.2)              | 91 (39.6)        | <0.0001  |
| Family history of premature CHD, %   | 196 (24.9)              | 44 (19.1)        | 0.070    |
| Smoking, %                           |                         |                  |          |
| Never                                | 491 (62.4)              | 104 (45.2)       | <0.0001  |
| Current                              | 96 (12.2)               | 46 (20.0)        |          |
| Former                               | 200 (25.4)              | 80 (34.8)        |          |
| Baseline prevalent disease, %        |                         |                  |          |
| Hypertension                         | 659 (83.7)              | 190 (82.6)       | 0.69     |
| Dyslipidemia                         | 579 (73.6)              | 134 (58.3)       | <0.0001  |
| Diabetes                             | 372 (47.3)              | 149 (64.8)       | <0.0001  |
| Age (years)                          | 67.2±5.9                | 69.5±6.5         | <0.0001  |
| Body mass index (kg/m <sup>2</sup> ) | 29.8±3.6                | 29.6±3.7         | 0.63     |
| Fasting glucose (mg/dL)              | 121.9±41.0              | 136.2±48.9       | <0.0001  |
| Total cholesterol (mg/dl)            | 210.3±37.1              | 212.1±35.7       | 0.086    |
| HDL cholesterol (mg/dL)              | 54.0±15.4               | 51.9±16.4        | 0.43     |
| LDL cholesterol (mg/dL)              | 130.8±33.4              | 131.4±33.4       | 0.81     |
| Triglyceride (mg/dL)                 | 135.0±79.3              | 151.5±83.4       | 0.0065   |
| Systolic blood pressure (mmHg)       | 147.3±20.3              | 154.9±23.1       | <0.0001  |
| Diastolic blood pressure (mmHg)      | 82.0±10.5               | 83.0±11.6        | 0.25     |
| Statin use                           | 317 (40.3)              | 57 (24.8)        | <0.0001  |

Abbreviations: EVOO, extra-virgin olive oil; CHD, coronary heart disease; HDL, high-density lipoprotein; LDL, low-density lipoprotein;

\*The sub-cohort also included 37 cases.

† For categorical and binary variables, *P*-values were calculated from  $\chi^2$ -test. For continuous variables, *P*-values were calculated from t-test.
